# Supplementary material for: Predicting tuberculosis risk in the foreign-born population of British Columbia, Canada: study protocol for a retrospective population-based cohort study
Source: PubMed Central journal article supplement — BMJ Open. 2016 Nov 25;6(11):e013488. doi: 10.1136/bmjopen-2016-013488 (PMC5168543; doi:10.1136/bmjopen-2016-013488), 2016-11-25
Supplement: bmjopen-2016-013488supp_appendices.pdf [file bmjopen-2016-013488supp_appendices.pdf]

## Appendix 1: Detailed definitions of potential risk factors

| Variable                                       | Definition                                                                                                                                                                                                       | Data source(s)               | Exposure Start                                                             | Exposure End                                     | Refs    |
|------------------------------------------------|------------------------------------------------------------------------------------------------------------------------------------------------------------------------------------------------------------------|------------------------------|----------------------------------------------------------------------------|--------------------------------------------------|---------|
| <b>1. TB-related factors</b>                   |                                                                                                                                                                                                                  |                              |                                                                            |                                                  |         |
| TB incidence in country of origin              | TB Incidence (All TB forms/100,000 population) in the country of birth in the year of arrival to Canada                                                                                                          | CIC / WHO TB Incidence Rates | Index date                                                                 | End of study follow-up (i.e. no end of exposure) | (1,2)   |
| BCG positive                                   | Recorded as BCG positive<br>OR<br>Probable BCG positive based on birth year and birth country                                                                                                                    | TB Registry / Literature     | Index date                                                                 | End of study follow-up                           | (1,3,4) |
| Active TB Contact                              | Close contact includes household/Type 1 exposures                                                                                                                                                                | TB Registry                  | Date of contact                                                            | End of study follow-up                           | (1)     |
| Abnormal chest x-ray                           | Result of chest x-ray (abnormal vs normal/unknown)                                                                                                                                                               | TB Registry                  | Date x-ray read                                                            | End of study follow-up                           | (1)     |
| TST positive                                   | First positive skin test (Recorded as positive test or induration $\geq 10$ mm)                                                                                                                                  | TB Registry                  | Date skin test read                                                        | End of study follow-up                           | (1)     |
| IGRA positive                                  | First positive IGRA test                                                                                                                                                                                         | TB Registry                  | Date IGRA read                                                             | End of study follow-up                           | (1)     |
| LTBI treatment completed                       | LTBI treatment completed (recorded as completed-satisfactory or completed-unsatisfactory)<br>OR<br>Estimated percent completion $\geq 80\%$ of recommended doses based on TB drug dispensation records           | TB Registry                  | 30 days after date first LTBI drug dispensed                               | End of study follow-up                           | (1)     |
| Referred by IRCC for post-landing surveillance | Date BCCDC received post-landing surveillance form                                                                                                                                                               | TB Registry                  | Date form received from IRCC                                               | End of study follow-up                           | (1,5)   |
| <b>2. Medical Co-morbidities</b>               |                                                                                                                                                                                                                  |                              |                                                                            |                                                  |         |
| HIV/AIDS                                       | HIV positive test or AIDS case recorded<br>OR<br>[ $\geq 1$ hospital discharge records<br>OR<br>$\geq 2$ MD billing records within 2 years with an ICD diagnosis code of HIV/AIDS: ICD9 042-044/ ICD10 B20-B24]* | BC HIV Registry / MSP/ DAD   | 90 days before first HIV positive test date or diagnosis date <sup>¶</sup> | End of study follow-up                           | (6,7)   |
| Silicosis                                      | [ $\geq 1$ hospital discharge records<br>OR<br>$\geq 2$ MD billing records within 2 years with an ICD diagnosis code of silicosis: ICD9 502, ICD10 J62]                                                          | MSP/ DAD                     | 90 days before diagnosis date                                              | End of study follow-up                           | -       |

|                              |                                                                                                                                                                                                                                                                                                                             |                               |                                        |                                        |         |
|------------------------------|-----------------------------------------------------------------------------------------------------------------------------------------------------------------------------------------------------------------------------------------------------------------------------------------------------------------------------|-------------------------------|----------------------------------------|----------------------------------------|---------|
| Chronic kidney disease (CKD) | 1+ chronic dialysis records in PROMIS<br>OR<br>2+ physician billing records separated by at least 90 days with an MSP billing fee item code for dialysis (323, 324, 350-352, 355, 356, 358, 359, 361, 7598, 7599, 33723, 33750-33752, 33708, 33756, 33758, 33759, 33761, 77390, 77380)<br>OR<br>Any GFR<30 ml/min in PROMIS | BC Renal Agency (PROMIS)/ MSP | 90 days before diagnosis date          | End of study-follow-up                 | (8,9)   |
| Cancer                       | Primary cancers of type=blood, head and neck, lung, or other solid organ (breast, gastrointestinal, genitourinary)                                                                                                                                                                                                          | BC Cancer Registry            | 90 days before diagnosis date          | 5 years after cancer diagnosis date    | (10,11) |
| Medical immuno-suppression   | Treatment episodes: $\geq 1$ dispensation records of immunosuppressant medications (See Appendix Table 2 for list of drugs included)<br>For <i>steroid</i> treatment episodes: convert doses to prednisone equivalents, include when there was a minimum dispensation of 20mg daily for 14 days, within a 21 day period     | Pharmanet                     | 30 days after first drug dispense date | 180 days after last drug dispense date | (12,13) |
| Diabetes                     | [1+ hospital discharge records OR<br>2+ MD billing records within 2 years with a diagnosis code of diabetes mellitus: ICD9 250.x / ICD10 E10.x-E14.x]‡                                                                                                                                                                      | MSP/ DAD                      | 90 days before diagnosis date          | End of study-follow-up                 | (14,15) |
| Solid organ transplant       | $\geq 1$ procedure code in hospital discharge records for transplant: CCP 455, 456, 495, 5899, 6249, 5352, 6484, 6483, 6759, 7792 / CCI: 1GR85, 1GT85, 1HY85, 1HZ85, 1NK85, 1NP85, 1OA85, 1OB85, 1OJ85, 1OK85, 1PC85, 1RB85)§                                                                                               | DAD                           | Transplant date                        | End of study-follow-up                 | (16,17) |

IRCC=Immigration, Refugees, and Citizenship Canada; ICD=International Classification of Diseases; DAD=hospital discharge abstract database; MSP=Medical Services Plan physician billing; CCI=Canadian Classification of Interventions; CCP=Canadian Classification of Procedures; PPV=positive predictive value; NPV=negative predictive value

\*93.2% sensitivity, 99.4% specificity(6)

‡ Pooled from 6 studies: 82.3% sensitivity, 92.9% specificity(15)

§ CCI code for kidney transplantation: 98% sensitivity, 98% PPV(16)

¶When comorbidity identified using only MSP/DAD data, 'diagnosis date'=first date when algorithm is met (i.e. if rule requires 2 or more MSP billing records, take as the earliest date of the 2 billing records)

## Appendix 2: Immunosuppressive Drugs

| Immunosuppressive drug type    | Drugs included                                                                                                                                                                                                                                                                                                                                                                                                                                                                                                                                                                                                                         |
|--------------------------------|----------------------------------------------------------------------------------------------------------------------------------------------------------------------------------------------------------------------------------------------------------------------------------------------------------------------------------------------------------------------------------------------------------------------------------------------------------------------------------------------------------------------------------------------------------------------------------------------------------------------------------------|
| 1. Cytotoxic (anti-neoplastic) | All drugs in AHFS class 10:00:00 (Antineoplastic Agents), excluding 'biologics' (see below in #3), Cyclophosphamide (see #4), Methotrexate (see #5), and Letrozole, Tamoxifen Citrate, and Tretinoin                                                                                                                                                                                                                                                                                                                                                                                                                                   |
| 2. TNF-alpha inhibitors        | <u>AHFS class 92:36 (Disease modifying antirheumatic agents)</u><br>Adalimumab<br>Etanercept<br>Golimumab<br>Infliximab                                                                                                                                                                                                                                                                                                                                                                                                                                                                                                                |
| 3. Other biologics             | <u>AHFS class 10:00:00 (Anti-neoplastic)</u><br>Alemtuzumab<br>Bevacizumab<br>Bortezomib<br>Cetuximab<br>Dabrafenib Mesylate<br>Dasatinib<br>Erlotinib HCl<br>Gefitinib<br>Ipilimumab<br>Lapatinib Ditosylate<br>Nilotinib HCl<br>Panitumumab<br>Regorafenib<br>Rituximab<br>Ruxolitinib Phosphate<br>Sorafenib Tosylate<br>Sunitinib Malate<br>Trastuzumab<br>Vemurafenib<br><u>AHFS class 92:20:00 (Biologic Response Modifier)</u><br>Natalizumab<br><u>AHFS class 92:36 (Disease modifying antirheumatic agents)</u><br>Abatacept<br>Anakinra<br><u>AHFS class 92:44:00 (Immunosuppressive Agents)</u><br>Basiliximab<br>Belimumab |
| 4. Dmards-high risk            | <u>AHFS class 10:00 (Antineoplastic Agents)</u><br>Cyclophosphamide<br><u>AHFS class 92:36 (Disease modifying antirheumatic agents)</u><br>Leflunomide<br><u>AHFS class 92:44 (Immunosuppressive agents)</u><br>Cyclosporine<br>Mycophenolate<br>Sirolimus<br>Tacrolimus                                                                                                                                                                                                                                                                                                                                                               |
| 5. Dmards-low risk             | <u>AHFS class 08:12:20 (Sulfonamides)</u><br>Sulfasalazine<br><u>AHFS class 10:00 (Antineoplastic Agents)</u><br>Methotrexate<br><u>All drugs of class AHFS 60:00:00 (Gold Compounds)</u><br><u>AHFS class 92:44 (Immunosuppressive agents)</u><br>Azathioprine                                                                                                                                                                                                                                                                                                                                                                        |
| 6. Steroids                    | All drugs of AHFS class 68:04:00 (Hormones and substitutes, adrenals), excluding                                                                                                                                                                                                                                                                                                                                                                                                                                                                                                                                                       |

**References:**

1. Public Health Agency of Canada. Canadian Tuberculosis Standards 7th Edition. 2014. Available from: <http://www.phac-aspc.gc.ca/tbpc-latb/pubs/tb-canada-7/index-eng.php> (Accessed 21-April-2016)
2. WHO World TB Database. [Internet] Available from: <http://www.who.int/tb/country/data/download/en/> (Accessed 22-Apr-2016)
3. The BCG World Atlas: A Database of Global BCG Vaccination Policies and Practices [Internet]. Available from: <http://www.bcgatlas.org/> (Accessed 22-Apr-2016)
4. World Health Organization. WHO vaccine-preventable diseases: monitoring system [Internet] 2016 Available from: [http://apps.who.int/immunization\\_monitoring/globalsummary](http://apps.who.int/immunization_monitoring/globalsummary) (Accessed May 26, 2016).
5. Khan K, Hirji MM, Miniota J, Hu W, Wang J, Gardam M, et al. Domestic impact of tuberculosis screening among new immigrants to Ontario, Canada. *CMAJ*. 2015 Nov 3;187(16):E473–81.
6. Antoniou T, Zagorski B, Loutfy MR, Strike C, Glazier RH. Validation of case-finding algorithms derived from administrative data for identifying adults living with human immunodeficiency virus infection. *PLoS One*. 2011;6(6):e21748.
7. Nosyk B, Colley G, Yip B, Chan K, Heath K, Lima VD, et al. Application and validation of case-finding algorithms for identifying individuals with human immunodeficiency virus from administrative data in British Columbia, Canada. *PLoS One*. 2013;8(1):e54416.
8. Grams ME, Plantinga LC, Hedgeman E, Saran R, Myers GL, Williams DE, et al. Validation of CKD and related conditions in existing data sets: A systematic review. *Am J Kidney Dis*. 2011 Jan;57(1):44–54
9. Ronksley PE, Tonelli M, Quan H, Manns BJ, James MT, Clement FM, et al. Validating a case definition for chronic kidney disease using administrative data. *Nephrol Dial Transpl*. 2012 May;27(5):1826–31.
10. Kamboj M, Sepkowitz KA. The risk of tuberculosis in patients with cancer. *Clin Infect Dis*. 2006 Jun 1;42(11):1592–5
11. Wu CY, Hu HY, Pu CY, Huang N, Shen HC, Li CP, et al. Aerodigestive tract, lung and haematological cancers are risk factors for tuberculosis: an 8-year population-based study. *Int J Tuberc Lung Dis*. 2011 Jan;15(1):125–30.
12. Brode SK, Jamieson FB, Ng R, Campitelli MA, Kwong JC, Paterson JM, et al. Increased risk of mycobacterial infections associated with anti-rheumatic medications. *Thorax*. 2015 Jul;70(7):677–82.
13. Winthrop KL, Baxter R, Liu L, Varley CD, Curtis JR, Baddley JW, et al. Mycobacterial diseases and antitumour necrosis factor therapy in USA. *Ann Rheum Dis*. 2013 Jan;72(1):37–42
14. Health Canada. Responding to the Challenge of Diabetes in Canada: First Report of the National Diabetes Surveillance System (NDSS) Canada [Internet] 2013. Available from: [http://www.phac-aspc.gc.ca/ccdpc-cpcmc/ndss-snsd/english/pubs\\_reports/pdf/NDSS\\_English\\_Report\\_FINAL.pdf](http://www.phac-aspc.gc.ca/ccdpc-cpcmc/ndss-snsd/english/pubs_reports/pdf/NDSS_English_Report_FINAL.pdf) (accessed 19-May-2016)
15. Leong A, Dasgupta K, Bernatsky S, Lacaille D, Avina-Zubieta A, Rahme E. Systematic review and meta-analysis of validation studies on a diabetes case definition from health administrative records. *PLoS One*. 2013;8(10):e75256.

16. Lam NN, McArthur E, Kim SJ, Knoll GA. Validation of kidney transplantation using administrative data. *Can J Kidney Health Dis.* 2015;2:20
17. Canadian Institute for Health Information (CIHI). Conversion Tables (for use with ICD-10-CA/CCI).[Internet] Available from: <https://secure.cihi.ca/estore/productSeries.htm?pc=PCC85>. (Accessed 16-May-2016)
